# Supplementary material for: Acid-mediated phase transition synthesis of stable nanocrystals for high-power LED backlights
Source: Royal Society of Chemistry journal article supplement (doi:10.1039/d2nr03431j), 2022-01-01
Supplement: d2nr03431j1.pdf [file d2nr03431j1.pdf]

## Supplementary Information

### **Acid-mediated phase transition synthesis of stable nanocrystals for high-power LED backlights**

Rong Chen,<sup>\*a</sup> Mengjia Liu,<sup>a</sup> Min Wang,<sup>b</sup> Yinghao Zhang,<sup>a</sup> Bin Shan<sup>b</sup> and Kun Cao<sup>\*a</sup>

*a. State Key Laboratory of Digital Manufacturing Equipment and Technology, School of Mechanical Science and Engineering, Huazhong University of Science and Technology, Hubei 430074, China.*

*b. State Key Laboratory of Material Processing and Die & Mould Technology, School of Materials Science and Engineering, Huazhong University of Science and Technology, Hubei 430074, China.*

*E-mail: rongchen@mail.hust.edu.cn, kuncao@hust.edu.cn*

In this work, the precursor concentration of  $\text{Cs}_4\text{PbBr}_6$  NCs plays a crucial role in the occurrence of the water-induced process. The introduction of water into the system with high precursor concentration hardly induced the phase transition process. As the dilution degree increased, the fluorescence emitted by the induced product under UV light changed from sky blue to green, which corresponded to the red shift of the PL spectrum (Figure S1a, b) as well as the narrowing of the FWHM of the PL spectrum (Table S1). At the same time, the absorption peaks corresponding to the induced products at higher precursor concentrations were weaker and enhanced with dilution degree. When it was further diluted to 6.88 mg/ml, it was found that the PL decreased, and the peak position blue shifted with wider FWHM. The appearance of the absorption peak at 310 nm indicated the existence of  $\text{Cs}_4\text{PbBr}_6$  NCs. This can be attributed to the low monomer concentration in the solution which limited the further growth of the NCs leading to the existence of mixed phases. Using the Tauc plot method to process the absorption spectra<sup>1-3</sup>, the band gaps of the induced products of different dilution concentrations were obtained (Figure S2). As for high concentration or precursor without dilution, the band gap was around 3.8 eV, which was consistent with the band gap of  $\text{Cs}_4\text{PbBr}_6$  NCs reported in the literature.<sup>4</sup> With the increase of dilution, the calculated band gap was close to 2.8 eV, which is consistent with  $\text{CsPbBr}_3$  NCs. Through experiments, a more suitable precursor concentration 10 mg/ml was determined, and subsequent experiments were carried out under this condition.

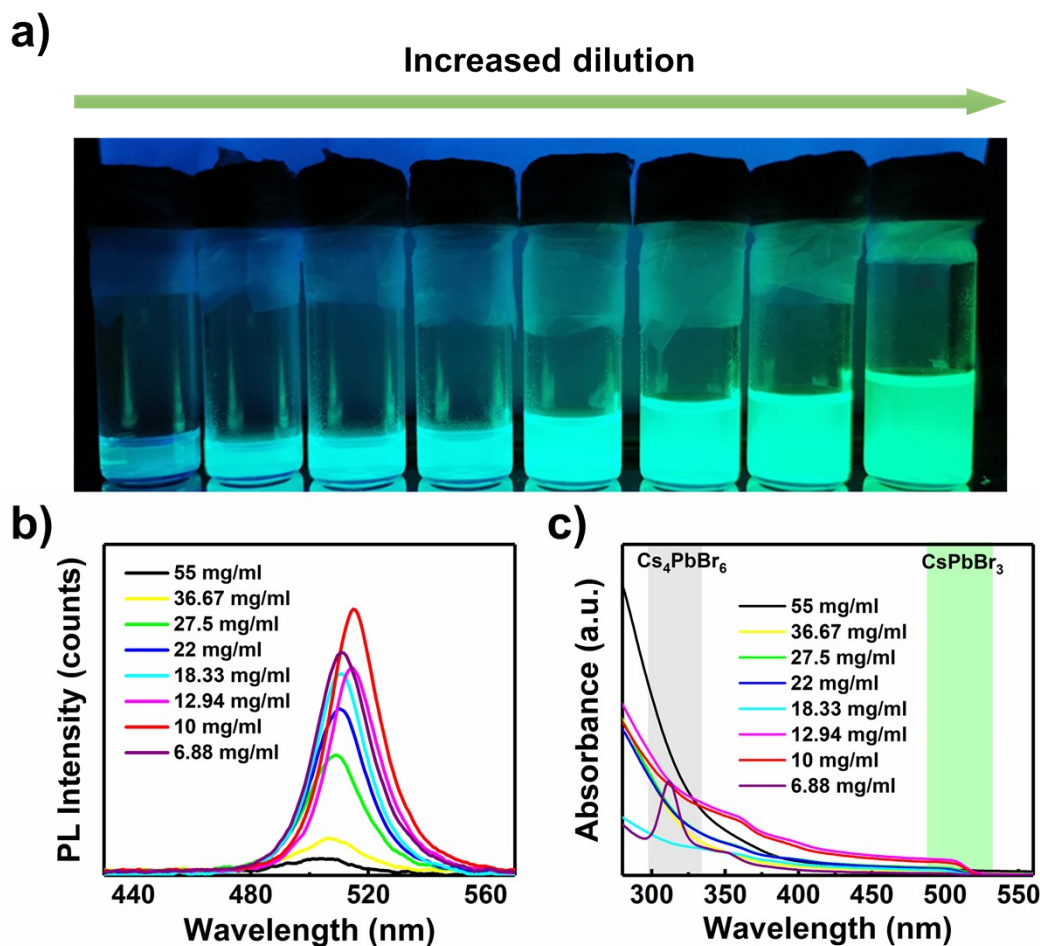

**Figure S1.** a) The image of products at different dilutions placed under UV light (365 nm). b) The PL spectra and c) absorption spectra of products at different dilution concentrations.

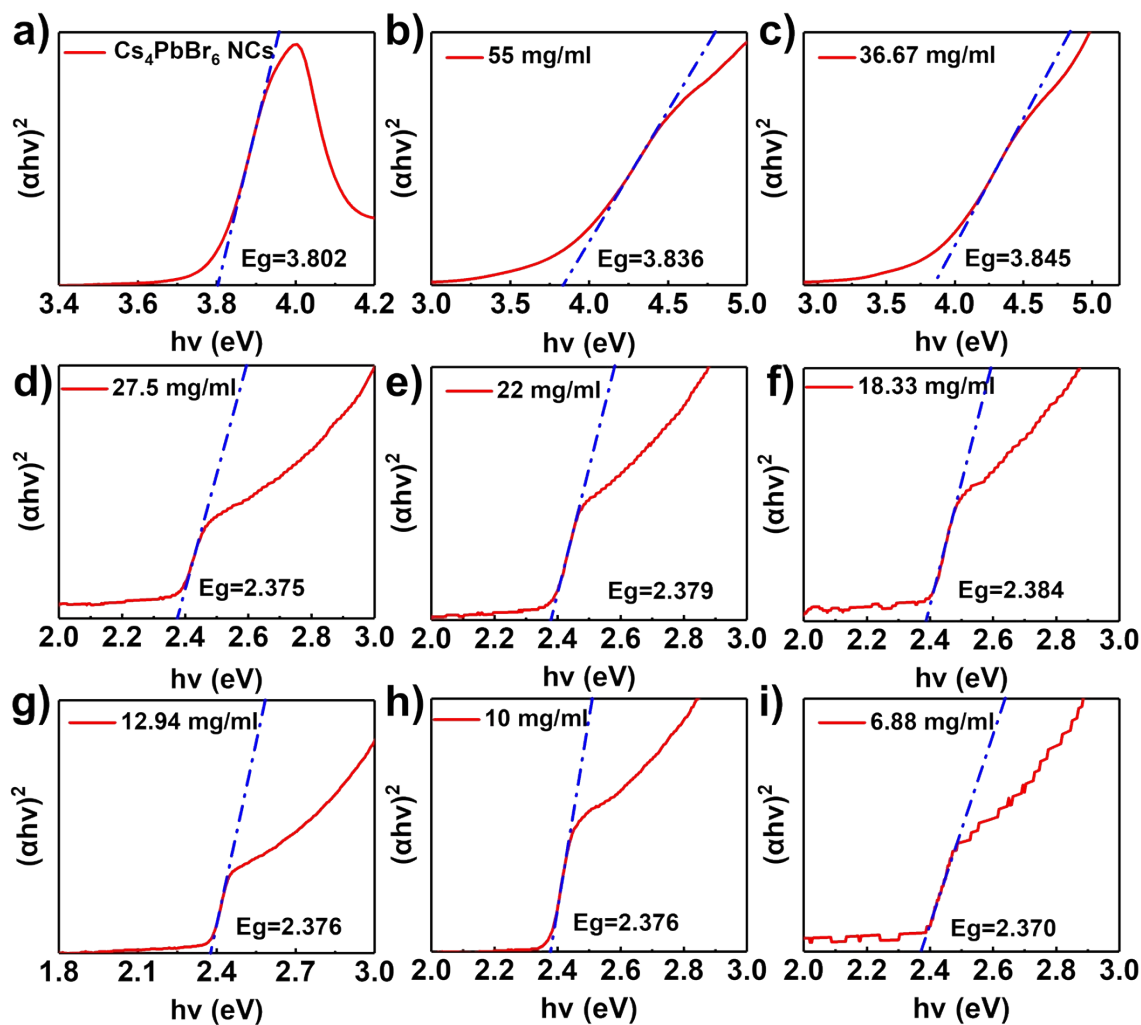

Figure S2. Calculation of band gaps at different dilutions using the Tauc plot method.

Table S1. The impact of the dilution degree of the precursor on the half-peak width and peak position of the fluorescence spectrum.

| Concentration (mg/ml) | PL Peak (nm) | FWHM (nm) |
|-----------------------|--------------|-----------|
| 55                    | 504.79       | 30.92604  |
| 36.67                 | 506.35       | 26.69579  |
| 27.5                  | 509.47       | 23.42387  |
| 22                    | 510.24       | 22.11278  |
| 18.33                 | 511.02       | 21.36878  |
| 12.94                 | 514.14       | 20.55895  |
| 10                    | 514.92       | 20.8541   |
| 6.88                  | 511.02       | 22.53928  |

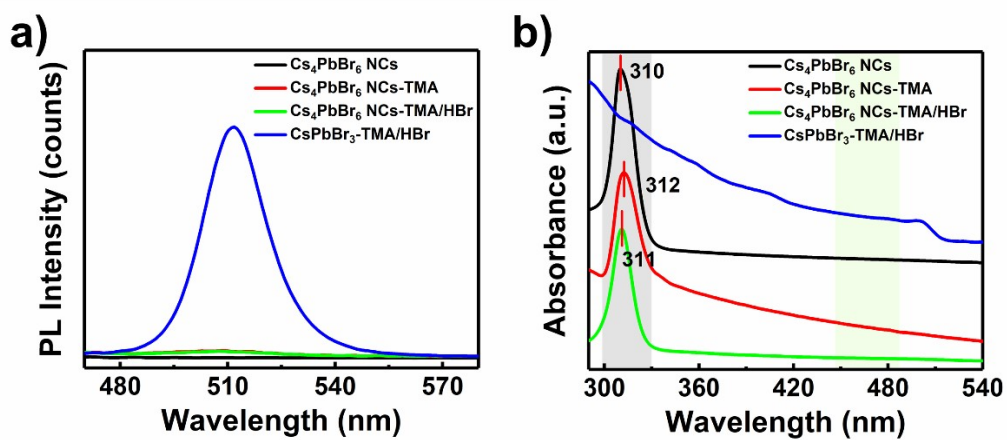

Figure S3. The a) PL and b) absorption spectra of Cs<sub>4</sub>PbBr<sub>6</sub> NCs precursor, Cs<sub>4</sub>PbBr<sub>6</sub>-TMA, Cs<sub>4</sub>PbBr<sub>6</sub>-TMA/HBr and CsPbBr<sub>3</sub>-TMA/HBr.

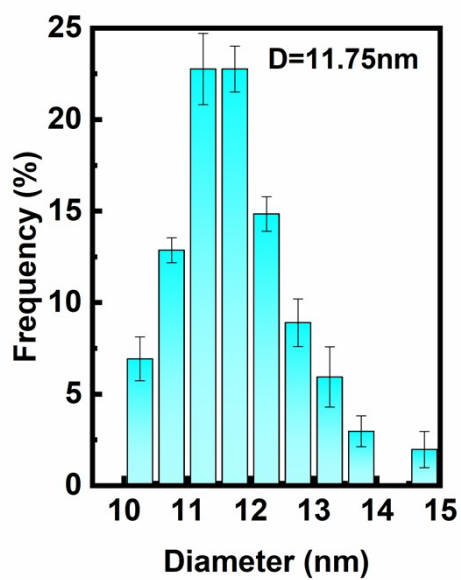

Figure S4. Particle size distribution of Cs<sub>4</sub>PbBr<sub>6</sub> NCs precursor.

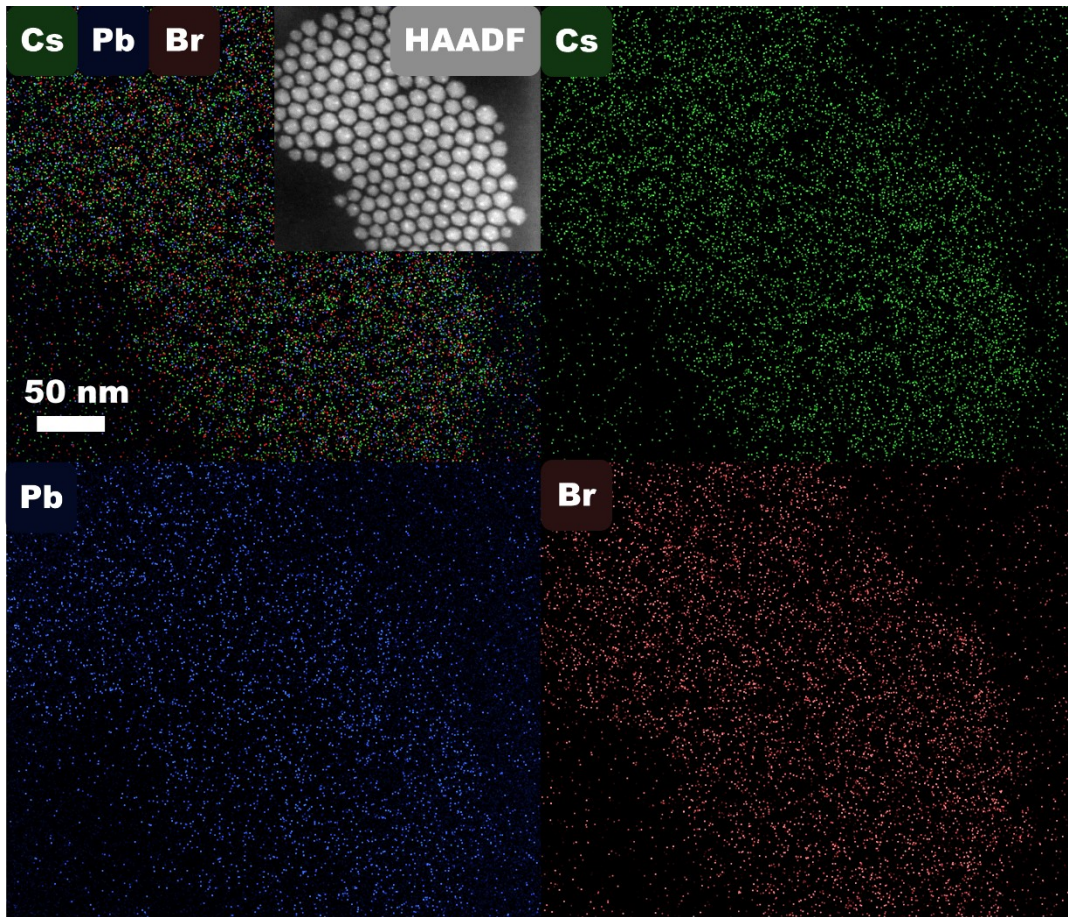

Figure S5. HAADF-STEM image of Cs<sub>4</sub>PbBr<sub>6</sub> NCs.



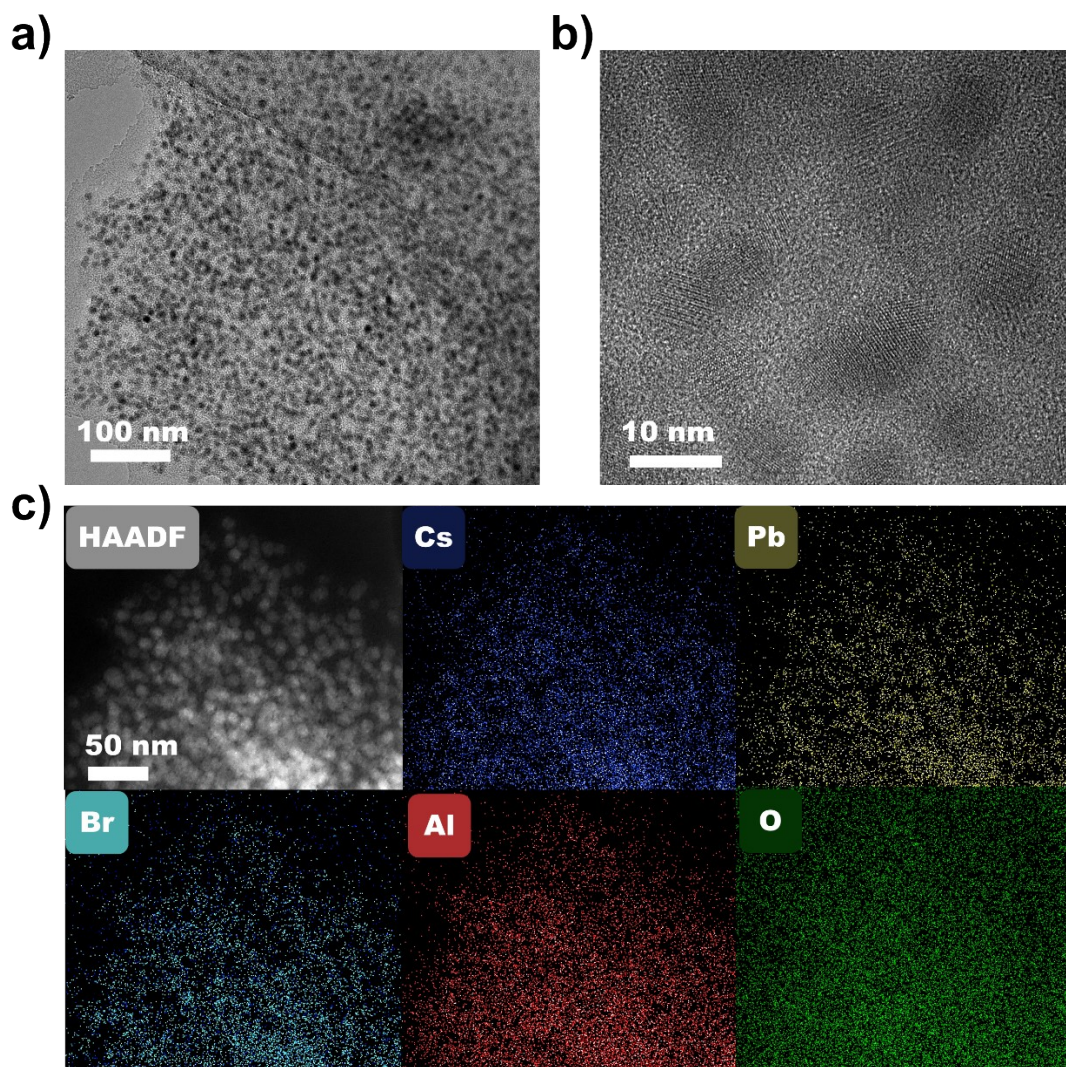

Figure S6. The a) TEM、 b) HRTEM and c) HAADF-STEM images of  $\text{Cs}_4\text{PbBr}_6\text{-TMA}$ .

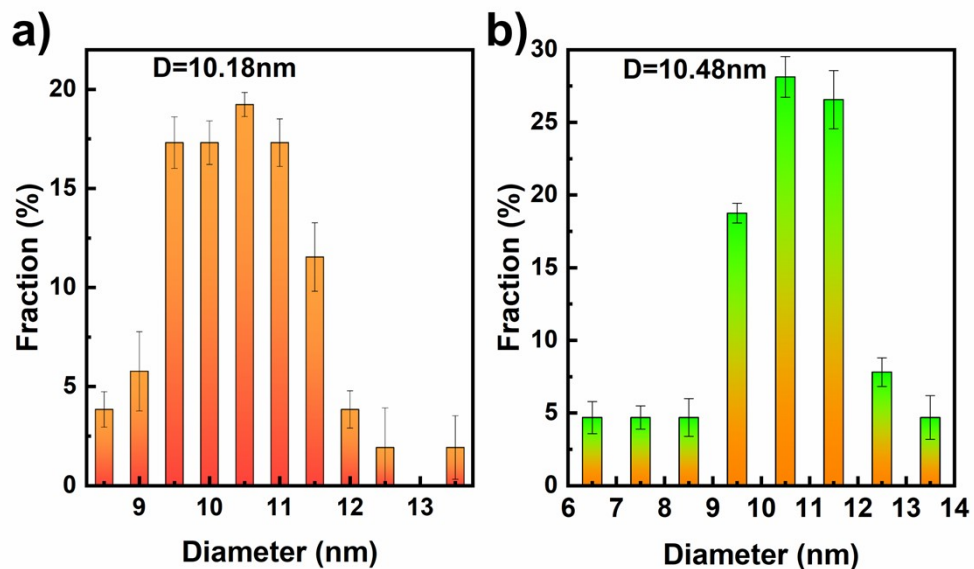

**Figure S7.** Particle size distributions of a) acid-free assisted water-triggered transformation product CsPbBr<sub>3</sub> NCs and b) acids co-assisted transformation product CsPbBr<sub>3</sub>-TMA/HBr.

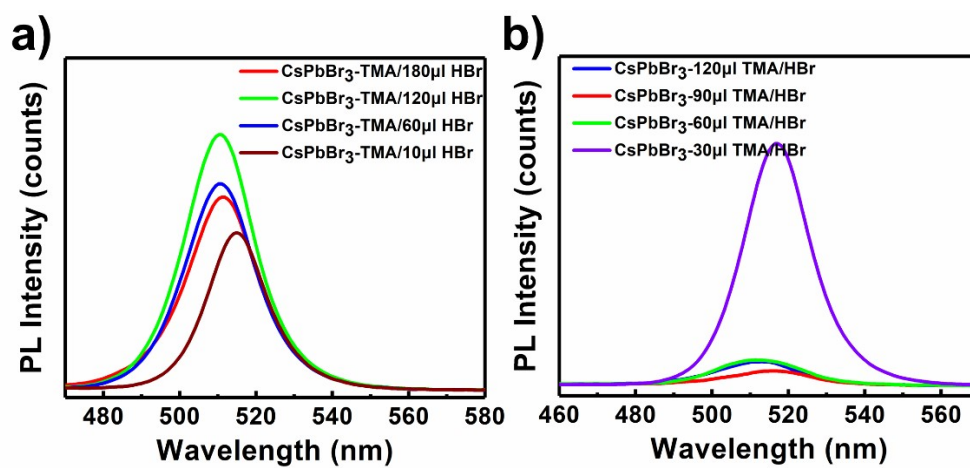

**Figure S8.** Effect of different content of hydrobromic acid and TMA treatments on PL spectrum of acids co-assisted transformation product CsPbBr<sub>3</sub>-TMA/HBr.

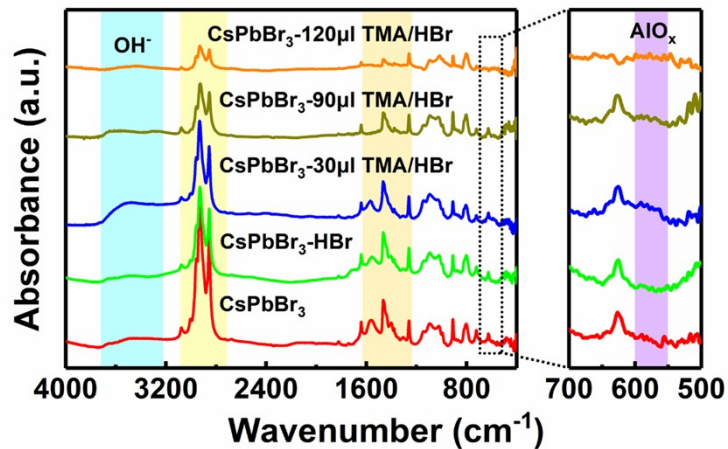

**Figure S9.** FTIR of samples treated with different TMA content and acid-free assisted water-triggered transformation product CsPbBr<sub>3</sub> NCs.

**Table S2.** The calculated area ratios of C-H bond based on the FTIR results.

| sample                             | area of C-H bond | ratio (%) |
|------------------------------------|------------------|-----------|
| CsPbBr <sub>3</sub>                | 27.96715         | 100       |
| CsPbBr <sub>3</sub> -HBr           | 18.72214         | 66.94     |
| CsPbBr <sub>3</sub> -30μl TMA/HBr  | 18.2277          | 65.18     |
| CsPbBr <sub>3</sub> -90μl TMA/HBr  | 10.95813         | 39.18     |
| CsPbBr <sub>3</sub> -120μl TMA/HBr | 8.29392          | 29.66     |

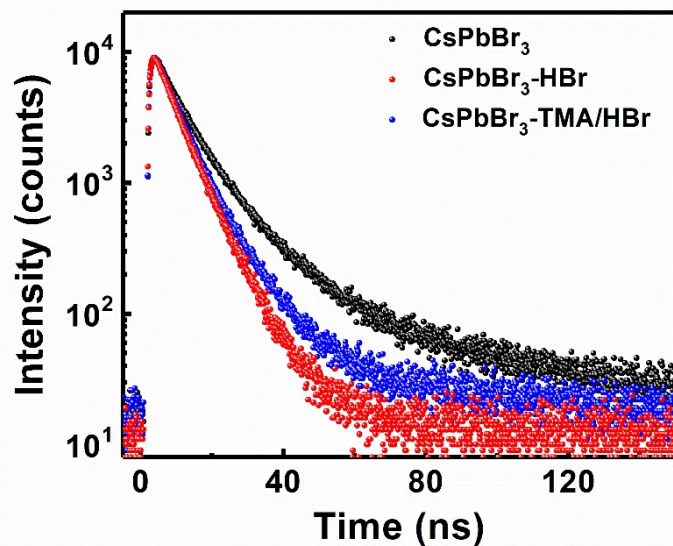

**Figure S10.** Time-resolved PL decay curves of CsPbBr<sub>3</sub>, CsPbBr<sub>3</sub>-HBr and CsPbBr<sub>3</sub>-TMA/HBr.

**Table S3.** The calculated fluorescence lifetime from time-resolved PL decay curves.

| Sample                       | $\tau_1$ (ns) | A1(%) | $\tau_2$ (ns) | A2(%) | $\tau_{avg}$ |
|------------------------------|---------------|-------|---------------|-------|--------------|
| CsPbBr <sub>3</sub>          | 7.18          | 47.22 | 40.66         | 52.78 | 36.09        |
| CsPbBr <sub>3</sub> -HBr     | 6.37          | 100   | -             | -     | 6.37         |
| CsPbBr <sub>3</sub> -TMA/HBr | 6.90          | 100   | -             | -     | 6.90         |



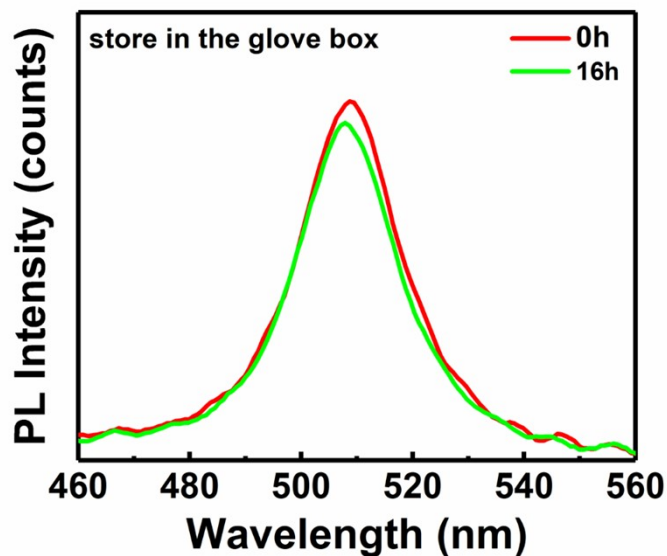

Figure S11. The PL change of CsPbBr<sub>3</sub> storage in the glove box.

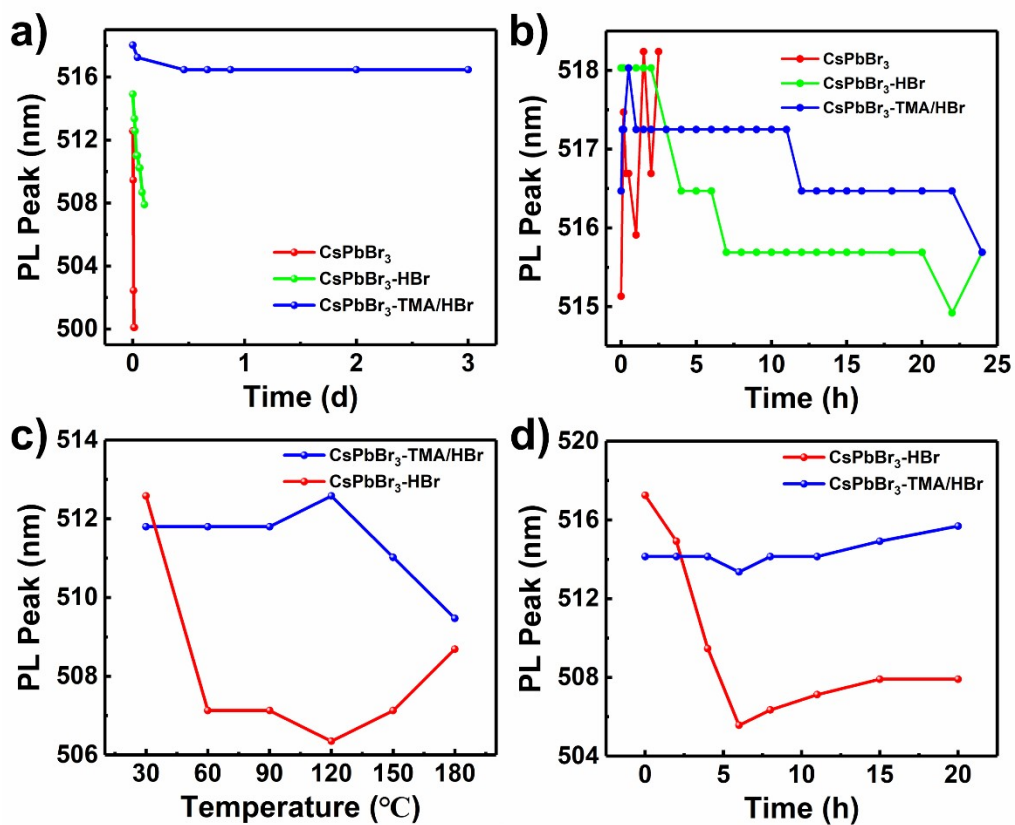

Figure S12. a) PL peak changes of air storage and b) water stability test of CsPbBr<sub>3</sub>, CsPbBr<sub>3</sub>-HBr and CsPbBr<sub>3</sub>-TMA/HBr. c) PL peak changes of heat and d) light stability test of CsPbBr<sub>3</sub>, CsPbBr<sub>3</sub>-HBr and CsPbBr<sub>3</sub>-TMA/HBr.

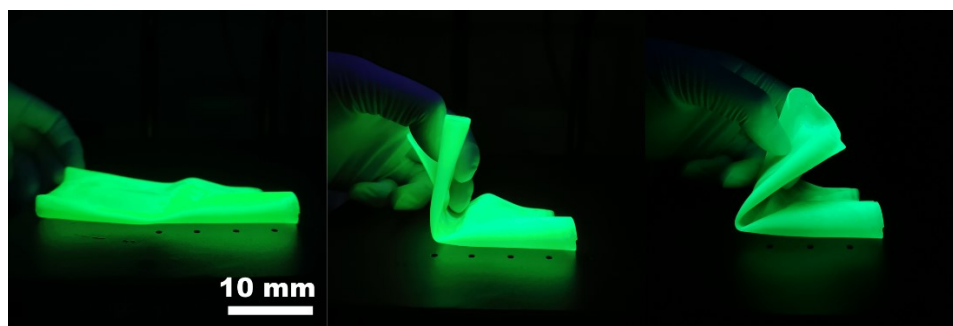

**Figure S13.** The quantum dot film bended.

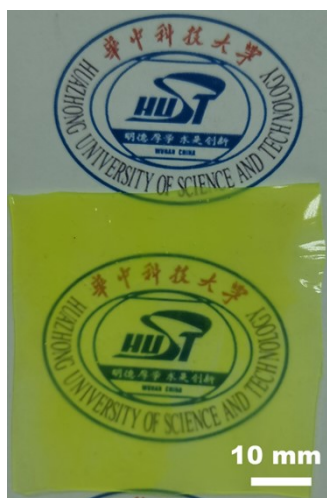

**Figure S14.** The quantum dot film on the pattern of Huazhong University of Science and Technology.

**Table S4.** Comparison of the stability of samples of this work and other perovskite NCs samples.

| Samples                                                    | air                             | water               | Reference |
|------------------------------------------------------------|---------------------------------|---------------------|-----------|
| CsPbBr <sub>3</sub> NCs                                    | 33 days (90%PL, 25 °C, 75%RH)   | 24 h (62%PL)        | this work |
| CsPbBr <sub>3</sub> @AlNO                                  | 30 days (95%PLQY, 25 °C, 20%RH) | 24 h (115%PL)       | 5         |
| SP-CsPbBr <sub>3</sub> NCs                                 | 60 days (~77%PLQY)              | -                   | 6         |
| ZnBr <sub>2</sub> -CsPbBr <sub>3</sub>                     | 6 days (60%PL)                  | -                   | 7         |
| CsPbBr <sub>3</sub> NCs                                    | 28 days (75%PLQY)               | -                   | 8         |
| CsPbBr <sub>3</sub> NCs                                    | 1 month (90%PLQY)               | -                   | 9         |
| PbBr <sub>2</sub> -CsPbBr <sub>3</sub>                     | 10 days (90%PLQY)               | -                   | 10        |
| CsPbBr <sub>3</sub> NCs                                    | 14 days (~70%PL)                | 3 h (75%PL)         | 11        |
| CsPbBr <sub>3</sub> NCs                                    | 70 days (21%PLQY)               | -                   | 12        |
| CsPbBr <sub>3</sub> NCs/AlO <sub>x</sub>                   | 45 days (100%PL)                | 1 h                 | 13        |
| OPA-CsPbBr <sub>3</sub> NCs                                | 3 days (90%PL)                  | -                   | 14        |
| CsPbBr <sub>3</sub> -TDPA QDs                              | -                               | 300 minutes (80%PL) | 15        |
| CsPbBr <sub>3</sub> /AlO <sub>x</sub>                      | -                               | 120 minutes (60%PL) | 16        |
| PS-capped MAPbBr <sub>3</sub> /SiO <sub>2</sub> NCs        | 14 days (80%PL)                 | -                   | 17        |
| CsPbBr <sub>3</sub> @Cs <sub>4</sub> PbBr <sub>6</sub> NCs | -                               | 24 h (0%PL)         | 18        |
| CsPbBr <sub>3</sub> NCs                                    | 6 days                          | -                   | 19        |

## References

- 1 E.A. Davis and N.F. Mott, *Philosophical magazine (London, England : 1945)*, 1970, **22**, 903-922.
- 2 J. Tauc, R. Grigorovici and A. Vancu, *physica status solidi (b)*, 1966, **15**, 627-637.
- 3 O.O. Akinwunmi, J.A.O. Ogundeji, A.T. Famojuro, O.A. Akinwumi, O.O. Ilori, O.G. Fadodun and E.O.B. Ajayi, *Journal of Modern Physics*, 2018, **09**, 2073-2089.
- 4 Q.A. Akkerman, S. Park, E. Radicchi, F. Nunzi, E. Mosconi, F. De Angelis, R. Brescia, P. Rastogi, M. Prato and L. Manna, *Nano Lett.*, 2017, **17**, 1924-1930.
- 5 J. Park, J. Park, Y. Kim, H. Zhou, Y. Lee, S.H. Jo, J. Ma, T. Lee and J. Sun, *Nat. Commun.*, 2020, **11**.
- 6 X. Liang, M. Chen, Q. Wang, S. Guo and H. Yang, *Angewandte Chemie International Edition*, 2019, **58**, 2799-2803.
- 7 J.Y. Woo, Y. Kim, J. Bae, T.G. Kim, J.W. Kim, D.C. Lee and S. Jeong, *Chem. Mater.*, 2017, **29**, 7088-7092.
- 8 F. Krieg, S.T. Ochsenbein, S. Yakunin, S. Ten Brinck, P. Aellen, A. Süess, B. Clerc, D. Guggisberg, O. Nazarenko, Y. Shynkarenko, S. Kumar, C. Shih, I. Infante and M.V. Kovalenko, *ACS Energy Letters*, 2018, **3**, 641-646.
- 9 X. Zhang, X. Bai, H. Wu, X. Zhang, C. Sun, Y. Zhang, W. Zhang, W. Zheng, W.W. Yu and A.L. Rogach, *Angewandte Chemie International Edition*, 2018, **57**, 3337-3342.
- 10 B.J. Bohn, Y. Tong, M. Gramlich, M.L. Lai, M. Döblinger, K. Wang, R.L.Z. Hoye, P. Müller-Buschbaum, S.D. Stranks, A.S. Urban, L. Polavarapu and J. Feldmann, *Nano Lett.*, 2018, **18**, 5231-5238.
- 11 L. Rao, X. Ding, X. Du, G. Liang, Y. Tang, K. Tang and J.Z. Zhang, *Beilstein J. Nanotech.*, 2019, **10**, 666-676.
- 12 H. Shankar, P. Bansal, W.W. Yu and P. Kar, *Chemistry—A European Journal*, 2020, **26**, 12242-12248.
- 13 A. Loiudice, S. Saris, E. Oveisi, D.T.L. Alexander and R. Buonsanti, *Angewandte Chemie International Edition*, 2017, **56**, 10696-10701.
- 14 Y. Tan, Y. Zou, L. Wu, Q. Huang, D. Yang, M. Chen, M. Ban, C. Wu, T. Wu, S. Bai, T. Song, Q. Zhang and B. Sun, *ACS Appl. Mater. Inter.*, 2018, **10**, 3784-3792.
- 15 T. Xuan, X. Yang, S. Lou, J. Huang, Y. Liu, J. Yu, H. Li, K.L. Wong, C. Wang and J. Wang, *Nanoscale*, 2017, **9**, 15286-15290.
- 16 B. Zhou, P. Wang, S. Geng, M. Wang, L. Qin, Y. Wen and R. Chen, *ACS Applied Electronic Materials*, 2021, **3**, 2398-2406.
- 17 Y. He, Y.J. Yoon, Y.W. Harn, G.V. Biesold-McGee, S. Liang, C.H. Lin, V.V. Tsukruk, N. Thadhani, Z. Kang and Z. Lin, *Sci Adv*, 2019, **5**, x4424.
- 18 J. Shi, W. Ge, W. Gao, M. Xu, J. Zhu and Y. Li, *Adv. Opt. Mater.*, 2019, **8**, 1901516.
- 19 M. Gong, B. Timalisina, R. Sakidja, J.T. Douglas and J.Z. Wu, *Adv. Opt. Mater.*, 2021, **9**, 2101012.
